# Supplementary material
Source: publisher figshare collection journal article supplement (https://acs.figshare.com/ndownloader/files/4253551)
Supplement: Supplementary file 1 [file 4253551]

**Supporting Information**  
*of*  
**Photo-responsive “Smart Surface” *via* Host-Guest Interaction for  
Reversible Cell Adhesion**

Yu-Hui Gong , Cao Li , Juan Yang , Hui-Yuan Wang , Ren-Xi Zhuo and Xian-Zheng  
Zhang\*

*Key Laboratory of Biomedical Polymers of Ministry of Education & Department of  
Chemistry, Wuhan University, Wuhan 430072, P. R. China*

\* Corresponding author. Tel.: + 86 27 6875 5993; fax: + 86 27 6875 4509.

*E-mail address:* xz-zhang@whu.edu.cn (X.Z. Zhang).

## 1. Materials and Methods

undecylenic acid (UA), *N,N*-dimethylformamide (DMF), pyridine, piperidine, dichloromethane ( $\text{CH}_2\text{Cl}_2$ ), triethoxysilane ( $\text{HSi}(\text{OEt})_3$ ), toluene, tetrahydrofuran (THF), methanol ( $\text{CH}_3\text{OH}$ ), trifluoroacetic acid (TFA), acetone, 98 % (v/v) sulfuric acid, 30 % (w/v) hydrogen peroxide, 36 % (v/v) hydrochloric acid (HCl) and  $\text{H}_2\text{PtCl}_6$  were purchased from Shanghai Reagent Chemical Co. (PR China). DMF, pyridine, toluene and acetone were purified by distillation. *O*-(*N*-succinimidyl)-*N,N,N',N'*-tetramethyluronium tetrafluoroborate (TSTU), sodium hydroxide (NaOH), 4-aminoazobenzene and succinic anhydride were obtained from Shanghai Reagent Chemical Co. (PR China). 3A-amino-3A-deoxy-(2AS,3AS)- $\alpha$ -cyclodextrin hydrate ( $\text{NH}_2$ - $\alpha$ -CD) was purchased from Tokyo Chemical Industries (TCI). *N*-Fluorenyl-9-methoxycarbonyl (Fmoc) protected L-amino acids (Fmoc-Arg(Pbf)-OH, Fmoc-Gly-OH, Fmoc-Asp(OtBu)-OH, Fmoc-Ser(tBu)-OH), 2-chlorotriyl chloride resin (100–200 mesh, loading: 0.4 mmol  $\text{g}^{-1}$ , 1 %DVB) and *o*-benzotriazole-*N,N,N',N'*-tetramethyluroniumhexafluorophosphate (HBTU) were purchased from GL Biochem Ltd. (Shanghai, China) and used as received. Molecular probe (Hoechst 33258) was purchased from Invitrogen (CA,USA) and Tubulin Tracker Oregon Green 488 Taxol, bis-acetate was purchased from Molecular Probes (USA). Dulbecco's Modified Eagle's Medium (DMEM), fetal bovine serum (FBS), penicillin streptomycin and Dulbecco's phosphate buffered saline (PBS) were purchased from Invitrogen Corp.

## **2. Synthesis of azobenzene-GRGDS and azobenzene-GDSRG**

### **Preparation of azobenzene-COOH**

4-Aminoazobene (1.97 g, 10 mmol) and succinic anhydride (1.20 g, 12 mmol) were dissolved into 25 ml distilled acetone. 0.79 g (10 mmol) anhydrous pyridine was added into the solution and the mixture was stirred for 6 h at 60 °C. The obtained suspension was filtered and after been dried at 50 °C for 48 h under vacuum drying, 2.85 g azobenzene-COOH (azo-COOH) was obtained. (yield: 96 %). Figure S1 shows the <sup>1</sup>H NMR spectrum of azo-COOH.

### **Preparation of azobenzene-GRGDS and azobenzene-GDSRG**

GRGDS peptide was manually synthesized in 0.6 mmol scale on the 2-chlorotrityl chloride resin, employing a standard Fmoc chemistry by solid phase peptide synthesis (SPPS) method. The coupling of the first residue used 4 equiv of Fmoc-protected amino acid (Fmoc-Ser(tBu)-OH) relative to resin substitution degree with 6 equiv of DIEA in a DMF solution. Other amino acid couplings and azo-COOH were carried out with 4 equiv of Fmoc-protecting amino acid or azo-COOH, 6 equiv of DIEA and 4 equiv of HBTU for 4 h. During the synthesis, the Fmoc protecting groups were deprotected with 20 % (v/v) piperidine/ DMF twice. The cleavage of peptide was performed in a mixture of deionized water, TIS and TFA in the ratio of 2.5:2.5:95. After 2 h stirring at room temperature, the mixture was collected. The excess TFA was removed by rotary evaporation and the remaining viscous peptide solution was precipitated in the cold ether. The resulting orange product was collected and vacuum dried. The preparation of azo-GDSRG was the same as azo-GRGDS. The molecular

weight of azo-GRGDS ( $[M^+]$ ) measured by ESI-MS was 768.5 (theoretical value: 768.3). Figure S2 shows ESI-MS spectrum of azo-GRGDS.

### 3. Pretreatment of quartz substrates

The quartz substrates were cleaned prior to alkanesilane assembly. The substrates were immersed for 2 h at 80 °C in “piranha” solution consisting of 3:7 ratio of aqueous solutions of 30 % (w/v) hydrogen peroxide and 98 % (v/v) sulfuric acid. (*Caution: this “piranha” solution has causticity and reacts violently with organic materials, so it need to be handled with extreme care*). After removal from “piranha” solution, quartz substrates were rinsed with deionized (DI) water and dried under nitrogen, then stored at room temperature.

### 4. Fabrication of $\alpha$ -CD SAMs

#### Preparation of compound 1 (See Scheme S1)

Undecylenic acid (UA) (1.30 g, 7.04 mmol) was dissolved in 10 ml distilled DMF and 10 ml dry pyridine was added. 1 equiv of TSTU (2.12 g, 7.04 mmol) was separately dissolved in 10 ml DMF and added slowly under stirring. The reaction flask was purged with nitrogen and reaction mixture was stirred for 5 h at room temperature. Then the solvent was evaporated and the residue was dissolved in 10 ml  $\text{CH}_2\text{Cl}_2$ . The precipitate was removed by filtration. The solution was washed with once 10 ml 5 % HCl and 10 ml DI water.  $\text{CH}_2\text{Cl}_2$  was evaporated and compound 1 was obtained. Figure S3 shows the  $^1\text{H}$  NMR spectrum of compound 1.

### **Fabrication of $\alpha$ -CD SAMs on quartz substrates (See Scheme S1)**

A solution of compound 1 (1.40 g, 5.00 mmol) in 10 equivalents of triethoxysilane (8.22 g, 50.00 mmol) was heated under anhydrous conditions to 95 °C and 60  $\mu$ l  $\text{H}_2\text{PtCl}_6$  was added. The mixture was allowed to stir for further 5 h at 95 °C. Excess  $\text{HSi}(\text{OEt})_3$  was removed under vacuum and the crude product was purified by filtration over celite. Compound 2 was obtained and then it was prehydrolysed in 36 ml anhydrous toluene and 40  $\mu$ l 1 mol/L NaOH as a catalyst for 5 h. The pretreated quartz substrates were immersed into the silane solution for 24 h. After deposition, the substrates were gently rinsed successively with THF and DI water and were blown dry in a nitrogen stream. TSTU (0.30 g, 1 mmol) was dissolved in 19 ml distilled DMF and 1 ml dry pyridine was added. The substrates were put into this solution and shaken for 2 h at 25 °C. Then the quartz substrates were rinsed with DMF and DI water, and immersed into 15 ml 2 mg/ml  $\text{NH}_2$ - $\alpha$ -CD for 12 h at 25 °C. After that, the substrates were rinsed with DI water and blown dry in a nitrogen stream. The quartz substrates containing  $\alpha$ -CD SAMs were obtained.

### **5. Assembling azo-GRGDS and azo-GDSRG onto $\alpha$ -CD SAMs**

15 mg azo-GRGDS was dissolved in 1.5 ml  $\text{CH}_3\text{OH}$  and this solution was dropped into 13.5 ml DI water. The  $\alpha$ -CD SAMs were put into this mixture and shaken gently for 24 h at room temperature. After assembly, the substrates were rinsed with DI water scrupulously and dried with a nitrogen stream. The  $\alpha$ -CD/azo-GRGDS SAMs were obtained. The preparation of  $\alpha$ -CD/azo-GDSRG SAMs was the same as

$\alpha$ -CD/azo-GRGDS SAMs.

## **6. Evaluation of cell Adhesion and proliferation on different surfaces**

Human cervix carcinoma (HeLa) cells were cultured in DMEM medium with 10 % FBS and 1 % antibiotics (penicillin-streptomycin, 10000 U/mL) at 37 °C in a humidified atmosphere containing 5 % CO<sub>2</sub>. Before seeding, all of substrates were sterilized with high temperature. 1 ml DMEM culture medium and 150  $\mu$ l DMEM medium containing  $2 \times 10^5$  cells/ml was added to each substrate and this culture was maintained for 24 h. Then clean quartz substrates,  $\alpha$ -CD/azo-GRGDS SAMs and  $\alpha$ -CD/azo-GDSRG SAMs were irradiated with UV light (365 nm, 15 W) for 10 min, the old medium was removed and new DMEM medium was added. These samples were incubated at 37 °C, 5 % CO<sub>2</sub> for 1 h. The UV irradiation process was repeated three times and then the cells were counted and recorded. The nucleus of HeLa cells was stained with 20  $\mu$ l (2  $\mu$ g/ $\mu$ l) of Hoechst 33258 for 15 min at 37 °C, after which the cells were further washed with PBS three times. Then 1 ml 0.5 mM Tublin Tracker Oregon Green 488 Taxol, bis-acetate solution was added into and these samples were incubated for 30 min at 37 °C/5 % CO<sub>2</sub>, after that the cells were washed three times with PBS. The cells were observed with a confocal laser scanning microscope (C1-Si, Nikon, Japan) equipped with a 405 nm diode for Hoechst 33258.

**Table S1.** Elemental composition on modified surfaces by XPS analysis.

| At%                        | C     | O     | N    |
|----------------------------|-------|-------|------|
| $\alpha$ -CD               | 27.59 | 71.84 | 0.54 |
| $\alpha$ -CD/azo-GRGDS     | 46.78 | 50.46 | 2.76 |
| $\alpha$ -CD/azo-GRGDS(UV) | 26.48 | 72.83 | 0.69 |

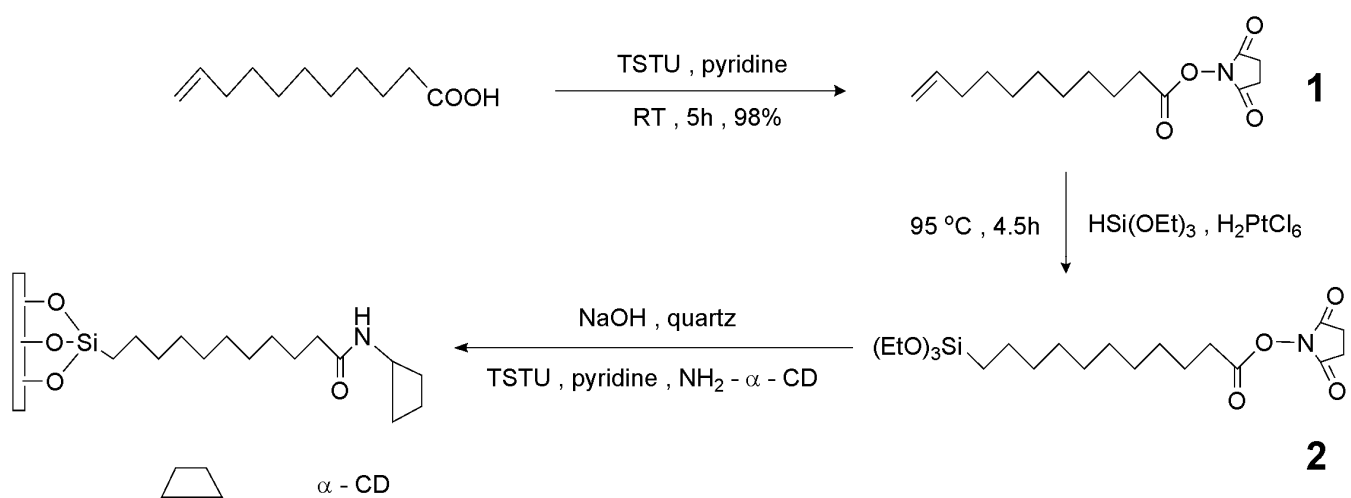

**Scheme S1.** Preparation of SAMs terminated with  $\alpha$ -CD.



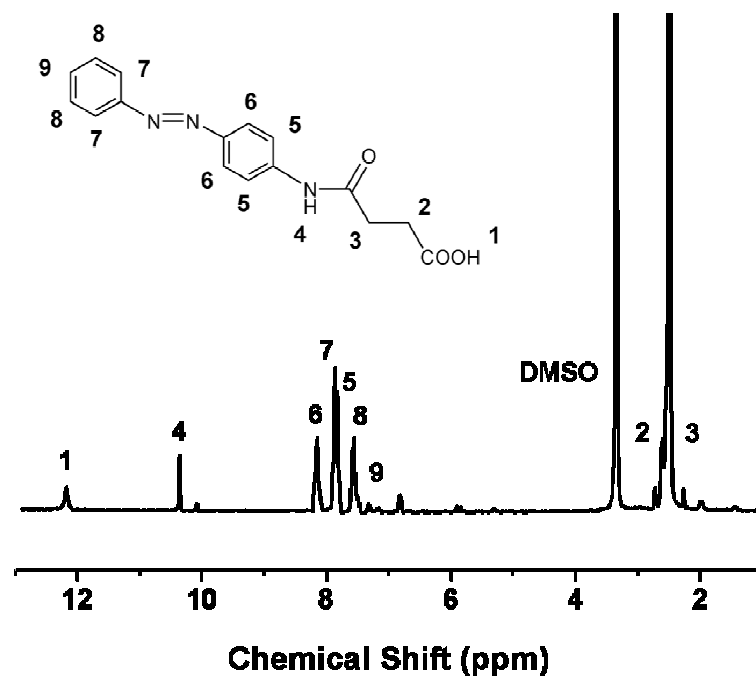

**Figure S1.**  $^1\text{H}$  NMR spectrum of azo-COOH.

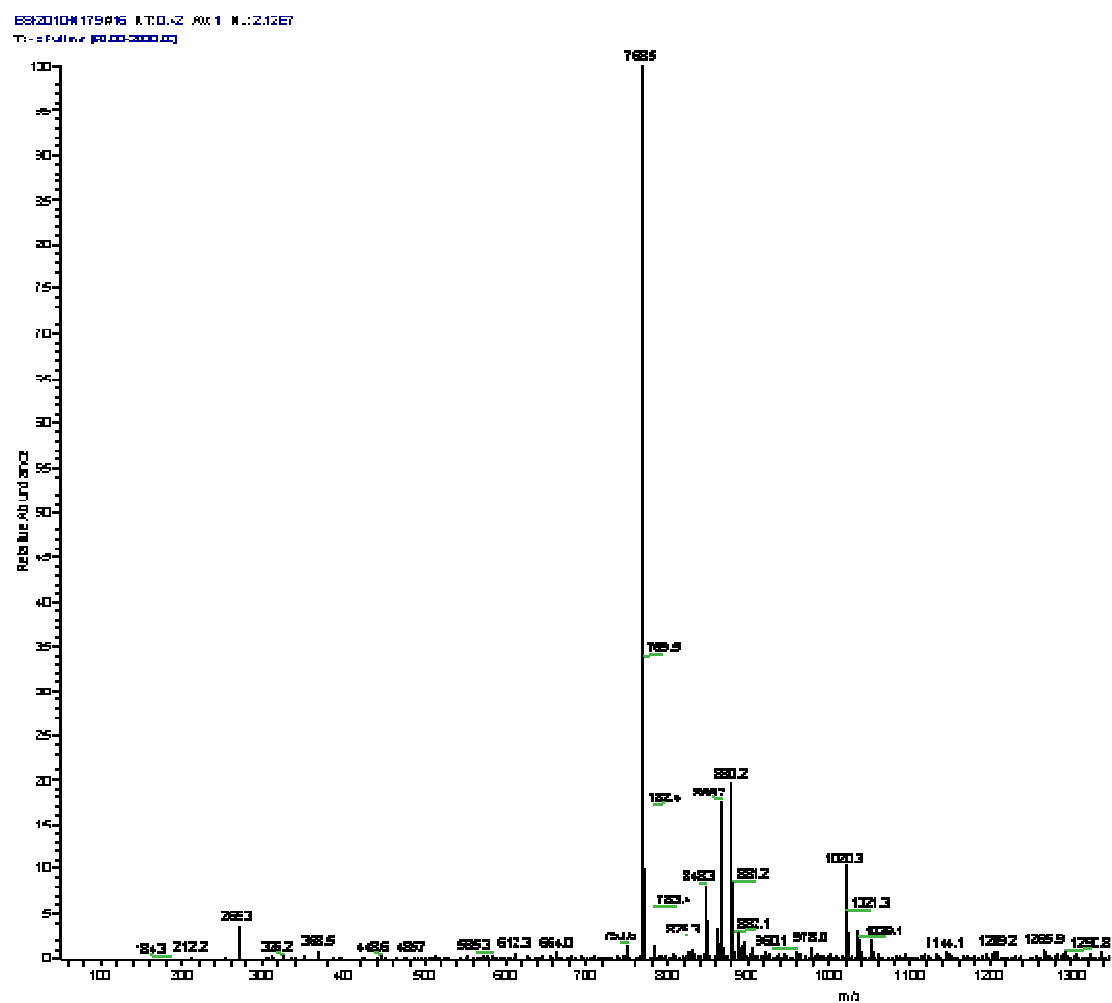

Figure S2. ESI-MS spectrum of azo-GRGDS.

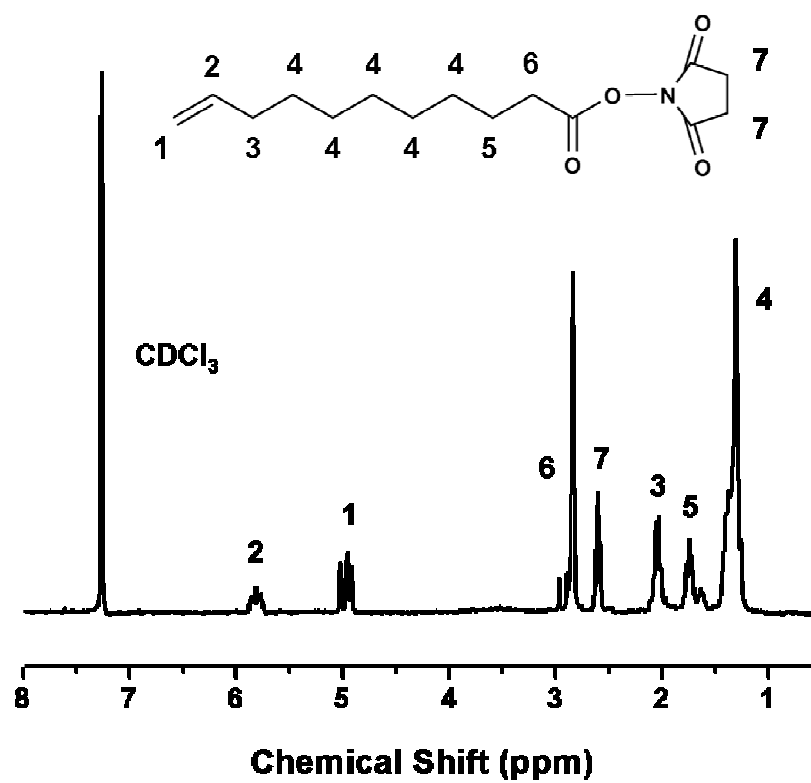

Figure S3.  $^1\text{H}$  NMR spectrum of compound 1.
